# Supplementary material
Source: PubMed Central journal article supplement (PMC3932921)
Supplement: 1324297111_pnas.201324297SI.pdf [file 1324297111_pnas.201324297SI.pdf]

# Supporting Information

Corces-Zimmerman et al. 10.1073/pnas.1324297111

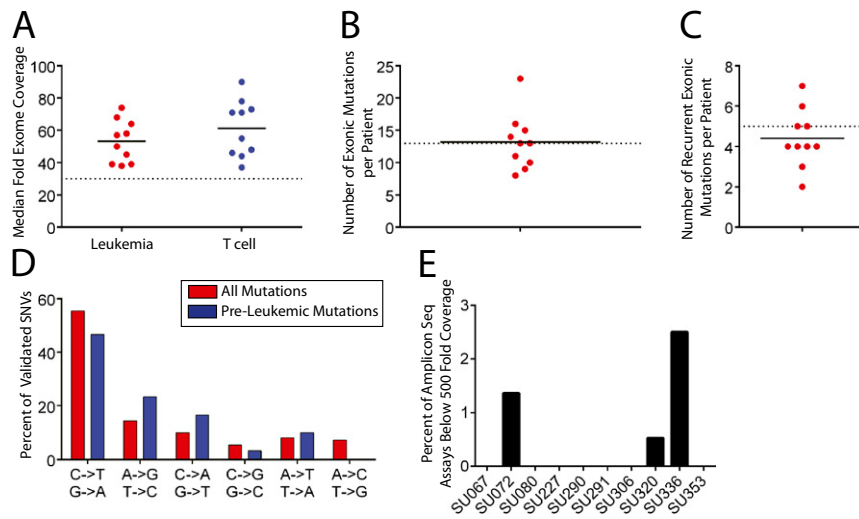

**Fig. S1.** Sequencing statistics from exome sequencing and targeted amplicon sequencing studies. (A) The median fold coverage of each individual exome sequencing analysis is plotted for both the leukemia exome and the T-cell (germ-line control) exome. Each patient was sequenced to >30-fold median coverage (dotted line). The total number of exonic mutations per patient (B) and the total number of recurrent exonic mutations per patient (C) are shown in comparison with the averages obtained in previous sequencing studies from The Cancer Genome Atlas (TCGA) Research Network (11) (dotted lines). (D) The rate of various transitions and transversions is shown for all leukemia-specific mutations and for the subset of mutations classified as preleukemic mutations. Both of the mutation spectrums are dominated by C-to-T transitions. (E) Targeted amplicon sequencing was performed on all leukemia-specific mutations from each patient in multiple cellular subpopulations. The total number of assays that were not covered to >500-fold coverage is shown for each patient. One hundred percent of all assays of recurrently mutated genes and more than 99% of all assays were covered to >500-fold.

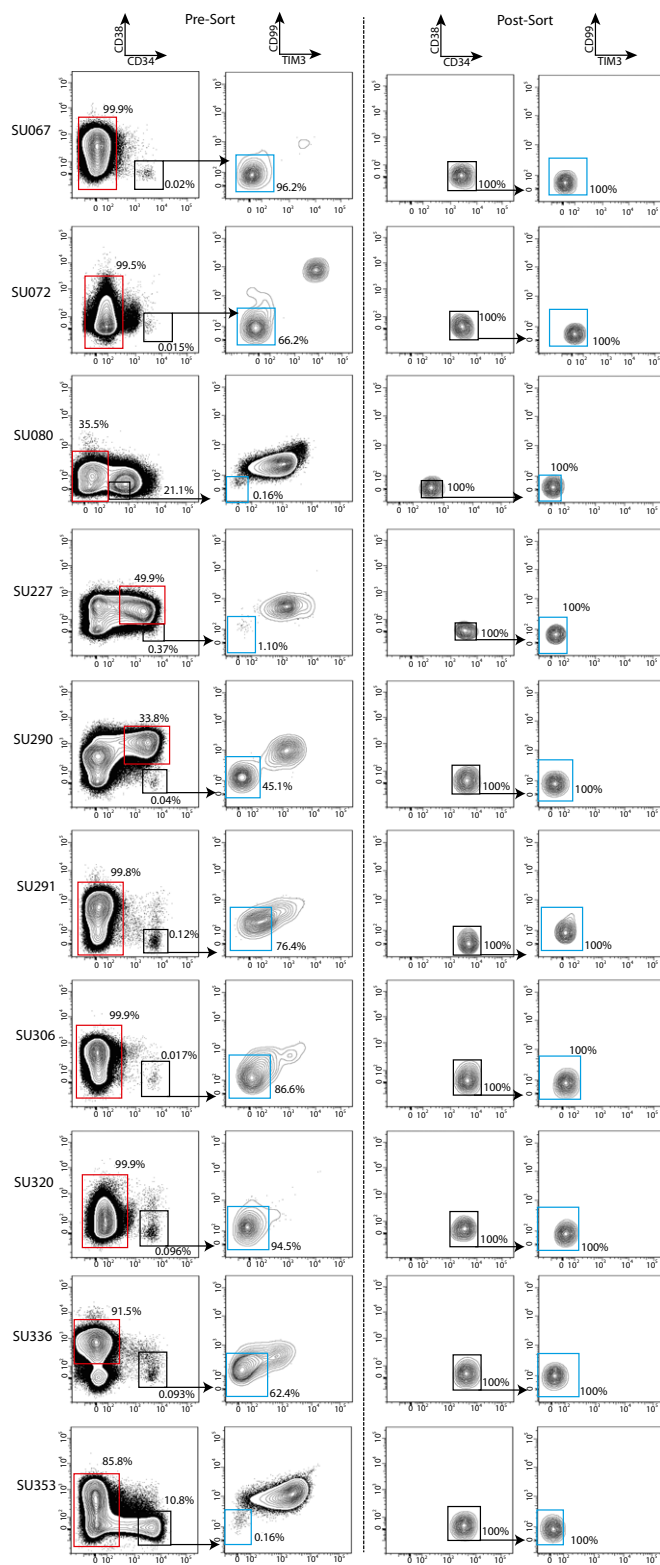

Fig. S2. Hematopoietic stem cell (HSC) sorting schemes for all 10 patients profiled by exome sequencing.  $CD34+CD38-$  cells from each patient were profiled for expression of leukemia-specific markers TIM3 and CD99. The  $CD34+/CD38-/TIM3-/CD99-$  population (blue box) was sorted to high purity. Leukemia cells (red box) were sorted as  $TIM3+/CD99+$ . Presort and postsort analyses of sorted HSCs are shown to indicate sort purity and rule out leukemia cell contamination.

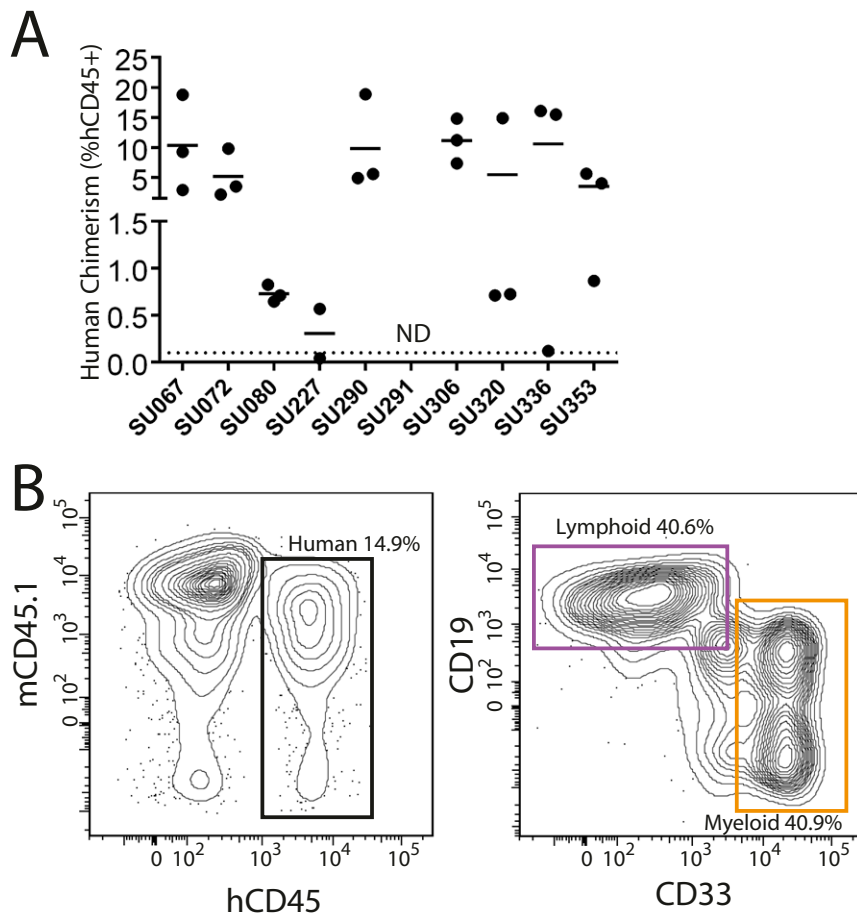

**Fig. 53.** Xenotransplantation studies of HSCs isolated from leukemia patients. HSCs from leukemia patients were transplanted in neonatal NOD/SCID/IL2R- $\gamma$  (NSG) mice via facial vein injection. (A) Levels of human chimerism, indicated by hCD45<sup>+</sup> cells, are shown for each of three mice transplanted with HSCs from each individual case. HSCs from case SU291 were not transplanted due to an insufficient number of cells. The average level of human chimerism is indicated by a horizontal bar, and the lower limit of detectable engraftment (0.1% hCD45<sup>+</sup> cells) is indicated by the dotted line. (B) An example of the long-term bilineage engraftment observed in all cases is shown. Engrafted cells contain both CD33<sup>+</sup> myeloid and CD19<sup>+</sup> lymphoid cells indicating engraftment of bona fide stem cells.

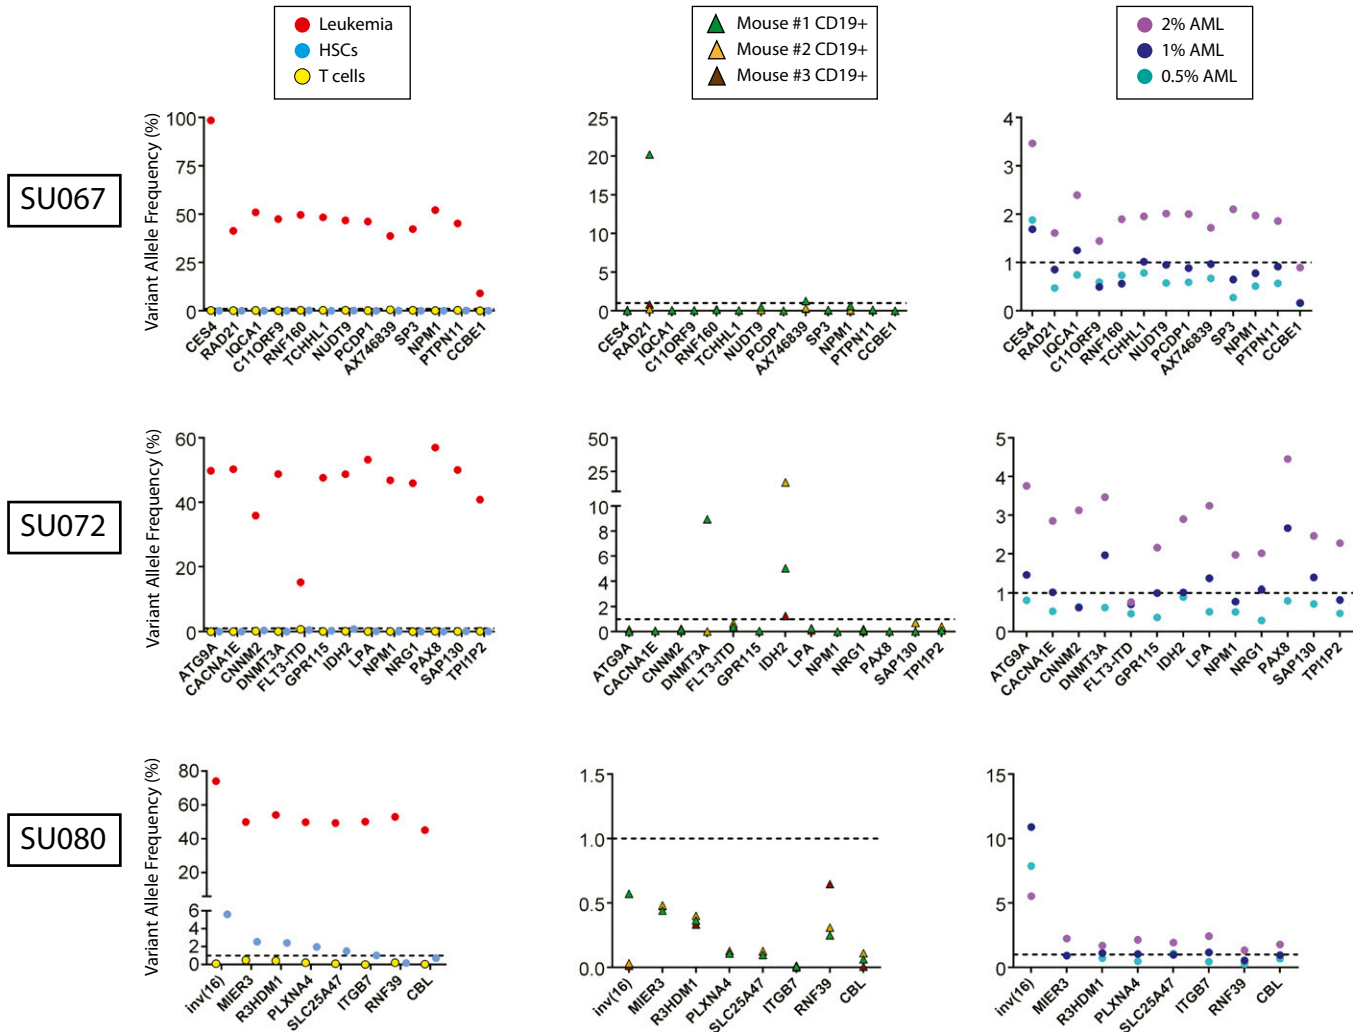

Fig. S4. (Continued)

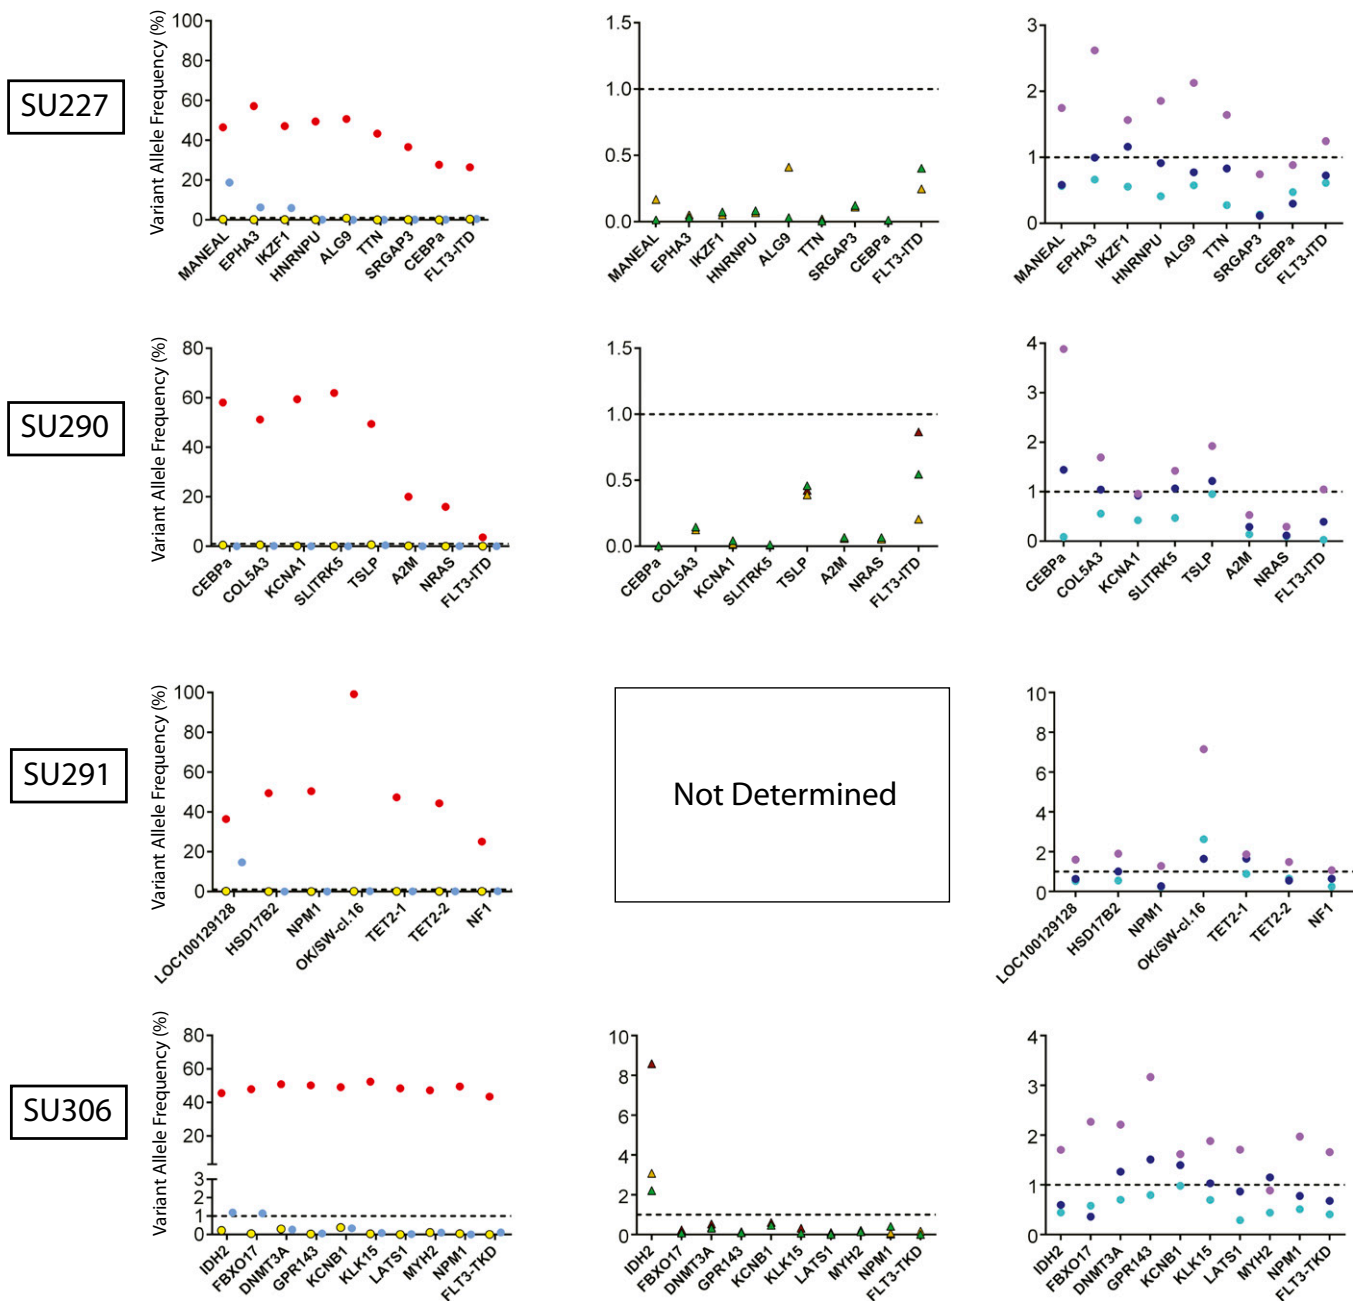

Fig. S4. (Continued)

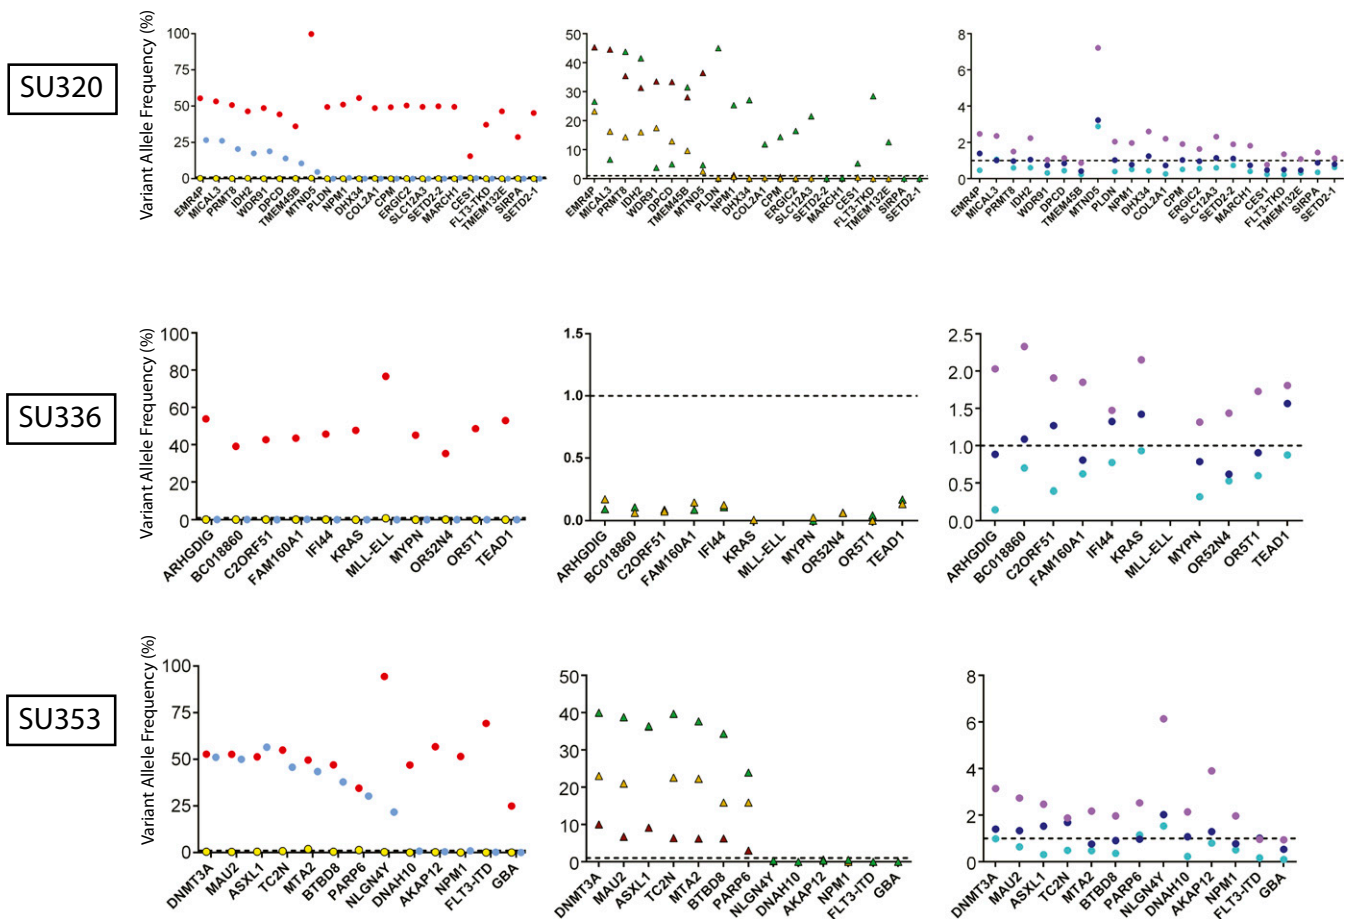

**Fig. 54.** Targeted amplicon sequencing of all leukemia-specific mutations in FACS-purified cells. FACS-purified leukemia cells, T cells, and HSCs were profiled by targeted amplicon sequencing for all leukemia-specific mutations (*Left*). Similarly, FACS-purified hCD45+CD19+ lymphoid and hCD45+CD33+ myeloid cells from mice engrafted with patient HSCs were profiled by targeted amplicon sequencing for all leukemia-specific mutations (*Center*). These assays were used to determine which mutations could be classified as preleukemic. Each assay was also subjected to quality control measurements, which involved the sequencing of admixtures of leukemia genomic DNA (gDNA) and nonleukemic control gDNA (*Right*). These assays were used to determine the accuracy of our sequencing methodologies in determining the variant allele frequency of low-abundance mutations.

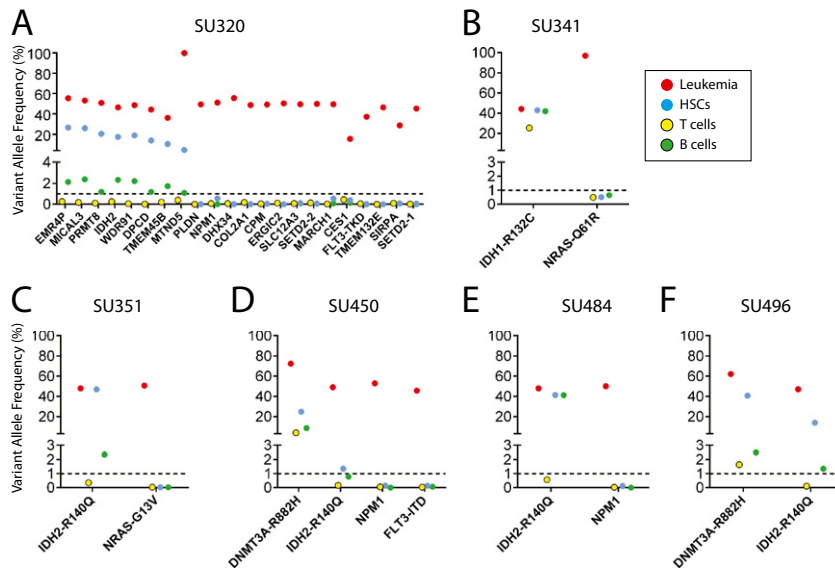

**Fig. S5.** Preleukemic mutations are detectable in B and T lymphocytes from acute myeloid leukemia (AML) patients. FACS-purified CD19+/CD20+ B cells and CD3+ T cells were profiled by targeted amplicon sequencing for all leukemia-specific mutations. (A–F) Cases in which preleukemic mutations could be detected in these lymphocytes are shown. In almost all cases, a late mutation was also profiled to demonstrate that detectable preleukemic mutations were not the consequence of leukemia cell contamination.



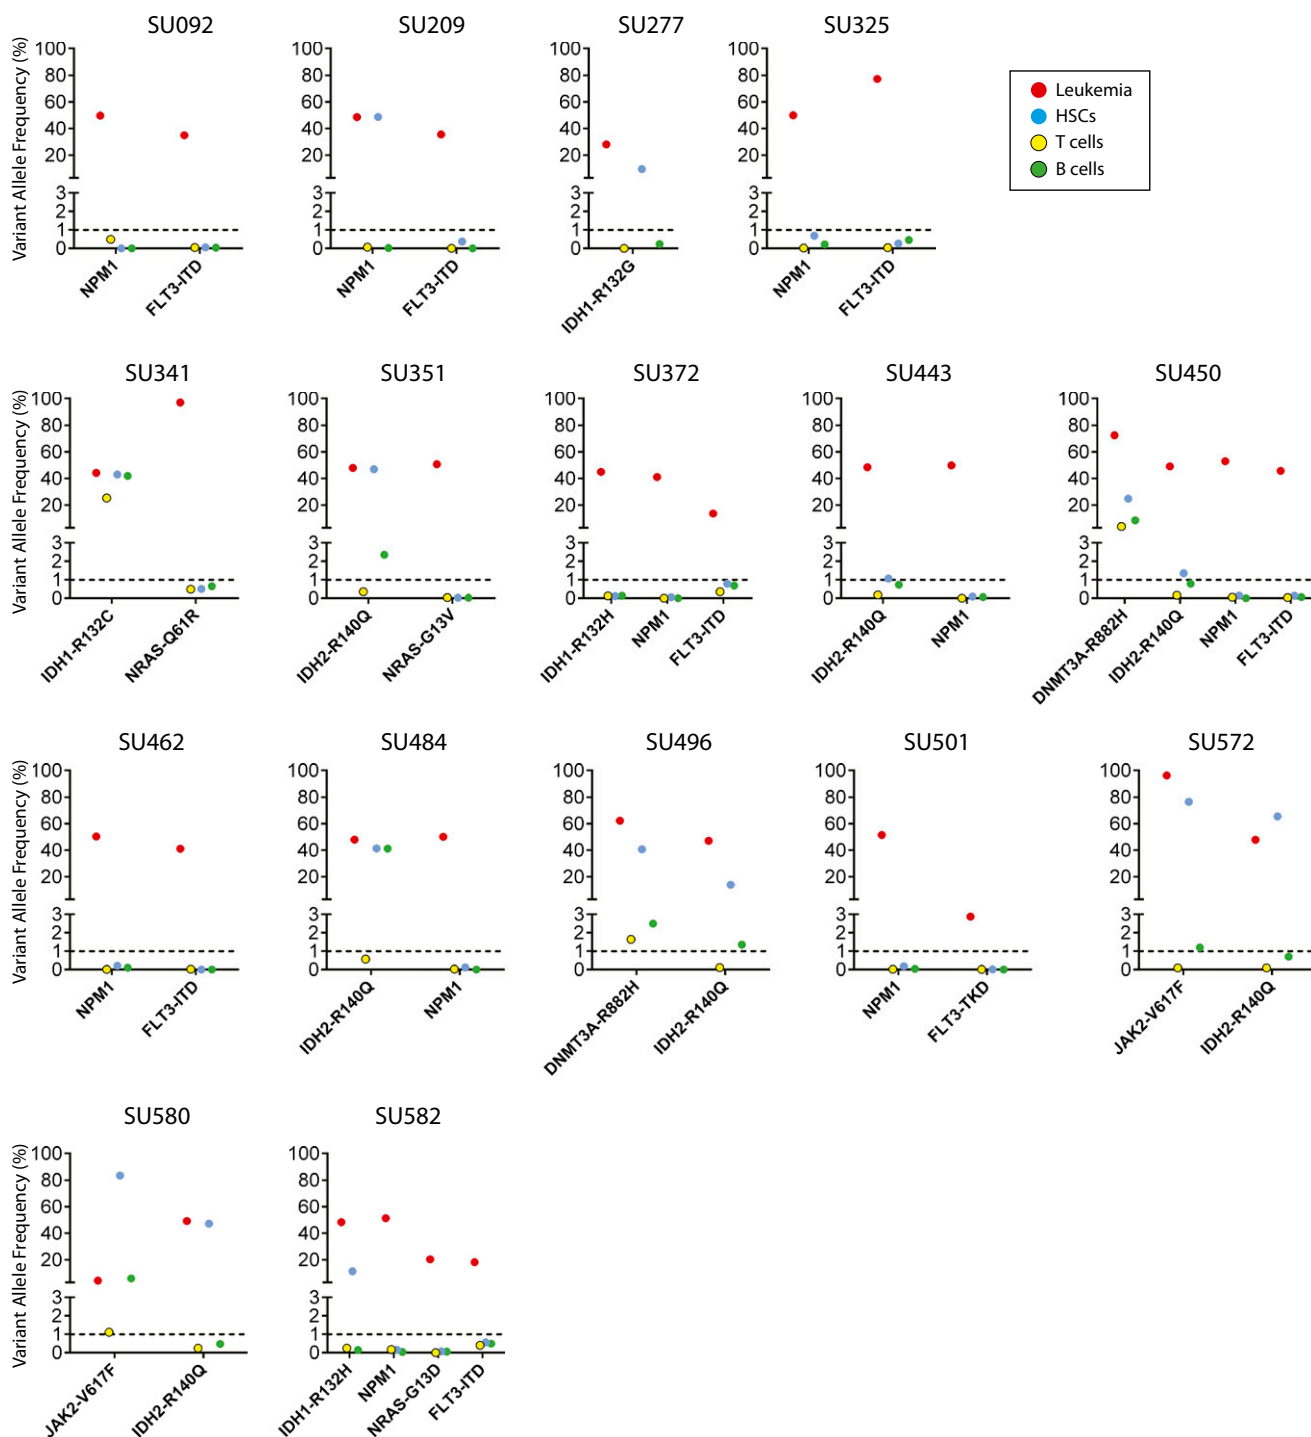

**Fig. S6.** Targeted amplicon sequencing of patients with known mutations in *IDH1/IDH2*, *DNMT3A*, *NPM1*, *FLT3*, or *KRAS/NRAS*. Targeted amplicon sequencing of FACS-purified leukemia cells, HSCs, T cells, and B cells from patients with known recurrent mutations in *IDH1/IDH2*, *DNMT3A*, *NPM1*, *FLT3*, or *KRAS/NRAS* was performed in 16 additional patients. Variant allele frequencies for each mutation profiled in each patient are shown.



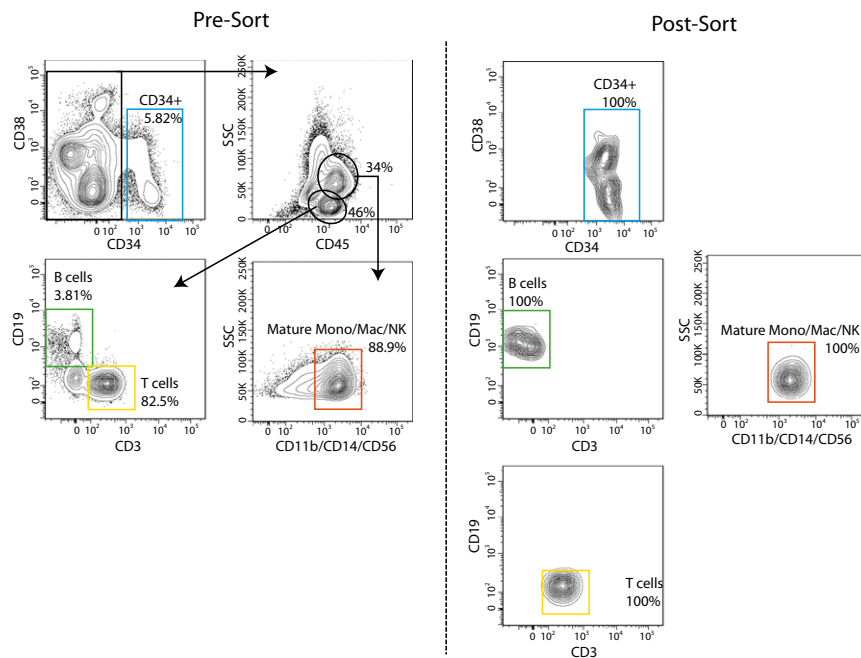

**Fig. S7.** Sorting scheme for remission bone marrow samples. Bone marrow mononuclear cells from patient SU353 were FACS purified for CD34+ cells, CD19+ B cells, CD3+ T cells, and CD11b+/CD14+/CD56+ monocytes, macrophages, and natural killer cells. Sample postsort analyses are presented for patient SU353 to show purity of sorted cells.

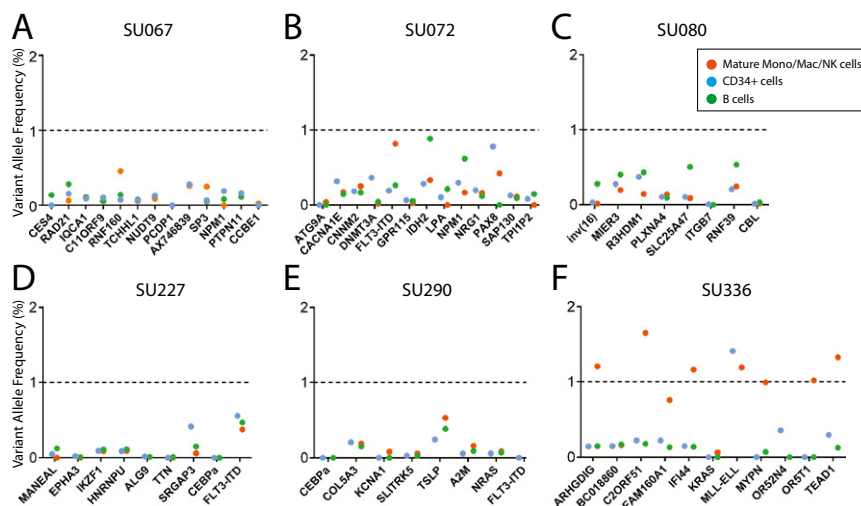

**Fig. S8.** Targeted amplicon sequencing of leukemia-specific mutations in remission cells. Bone marrow mononuclear cells from each patient were FACS purified. (A-F) Targeted amplicon sequencing of all leukemia-specific mutations was performed on gDNA from remission CD34+ cells, B cells, and mature monocytes, macrophages, and natural killer cells. Results from six patients are indicated.

**Table S1. Recurrent and preleukemic mutations identified by exome and targeted amplicon sequencing of 10 AML patients**

| Patient | Age | Sex | Recurrent mutations                                | Preleukemic recurrent mutations         | Evidence for preleukemia                             |
|---------|-----|-----|----------------------------------------------------|-----------------------------------------|------------------------------------------------------|
| SU067   | 52  | F   | NPM1, RAD21, PTPN11, CES4                          | RAD21                                   | CD19+ lymphoid cells from transplant                 |
| SU072   | 57  | M   | NPM1, FLT3-ITD, IDH2, DNMT3A, CACNA1E, SAP130, LPA | IDH2, DNMT3A                            | CD19+ lymphoid cells from transplant                 |
| SU080   | 37  | M   | inv(16), CBL, MIER3                                | inv(16), MIER3                          | Sorted HSCs                                          |
| SU227   | 29  | M   | FLT3-ITD, CEBPa, IKZF1, EPHA3                      | IKZF1, EPHA3                            | Sorted HSCs                                          |
| SU290   | 64  | M   | FLT3-ITD, CEBPa, NRAS                              | —                                       | No preleukemia identified                            |
| SU291   | 35  | F   | NPM1, TET2, NF1, trisomy 8                         | —                                       | Sorted HSCs                                          |
| SU306   | 32  | F   | NPM1, FLT3-D835, IDH2, DNMT3A                      | IDH2                                    | Sorted HSCs and CD19+ lymphoid cells from transplant |
| SU320   | 68  | M   | NPM1, FLT3-ITD, IDH2, COL2A1, DHX34                | IDH2, COL2A1, DHX34                     | Sorted HSCs and CD19+ lymphoid cells from transplant |
| SU336   | 29  | F   | MLL-ELL, KRAS-G13D                                 | —                                       | No preleukemia identified                            |
| SU353   | 65  | M   | NPM1, FLT3-ITD, DNMT3A, ASXL1, AKAP12, PARP6       | DNMT3A, ASKL1, PARP6                    | Sorted HSCs and CD19+ lymphoid cells from transplant |
| SU008   | 64  | M   | FLT3-ITD                                           | —                                       | Sorted HSCs                                          |
| SU014   | 59  | M   | IDH1, SMC1A, ZBTB33, C10ORF76, NPM1, FLT3-ITD      | NPM1, SMC1A, ZBTB33                     | Sorted HSCs                                          |
| SU030   | 52  | F   | SLC12A1, NPM1, FLT3-ITD                            | —                                       | Sorted HSCs                                          |
| SU043   | 38  | F   | NPM1, FLT3-ITD                                     | —                                       | No preleukemia identified                            |
| SU048   | 79  | F   | TET2, SMC1A, NPM1, FLT3-ITD                        | TET2, SMC1A                             | Sorted HSCs and CD19+ lymphoid cells from transplant |
| SU070   | 72  | F   | TET2, PHF6, CTCF, KALRN, DOCK9, PLA2G4D, FLT3-ITD  | TET2, PHF6, CTCF, KALRN, DOCK9, PLA2G4D | Sorted HSCs and CD19+ lymphoid cells from transplant |

Patient demographic and recurrent mutations identified in each case are indicated. In addition, recurrent mutations that were found to be preleukemic are indicated alongside the sequencing information used to inform that classification.

Table S2. Patient clinical information

| Sample | Age | Sex | Primary/secondary | De novo/relapsed   | Cytogenetics             | FLT3-ITD | WHO classification                                 | FAB   | Induction treatment | Consolidation treatment   | Relapse?           | Transplant?                                  | Current disease status         |
|--------|-----|-----|-------------------|--------------------|--------------------------|----------|----------------------------------------------------|-------|---------------------|---------------------------|--------------------|----------------------------------------------|--------------------------------|
| SU067  | 52  | F   | Primary           | De novo            | Normal                   | Negative | AML-not otherwise specified                        | M5    | 3+4                 | ME × 2, HIDAC × 2         | Yes, 1 y 5 mo      | Yes, myeloablative MUD in CR2                | Alive, CR2, 2 y 10 mo          |
| SU072  | 58  | M   | Primary           | De novo            | Normal                   | Positive | AML-not otherwise specified                        | M1    | 3+7                 | HIDAC × 4                 | N/A                | No                                           | Alive, CR1, 2 y 8 mo           |
| SU080  | 37  | M   | Primary           | De novo            | inv(16)                  | Negative | AML with inv(16)(p13.1;q22) or t(16;16)(p13.1;q22) | M5    | 3+7                 | HIDAC × 3                 | Unknown            | Unknown                                      | Unknown, lost to f/u 4 mo      |
| SU227  | 29  | M   | Primary           | De novo            | Normal                   | Positive | AML with myelodysplasia-related changes            | N/A   | G-CLAC              | G-CLAC × 3                | No                 | Yes, Haplo in CR1                            | Deceased, 7 mo, TRM from haplo |
| SU290  | 64  | M   | Primary           | De novo            | Normal                   | Weak     | AML-not otherwise specified                        | M5    | G-CLAC              | G-CLAC × 1, Int Ara-C × 1 | No                 | Yes, NMA MUD in CR1                          | Alive, 1 y 10 mo               |
| SU291  | 35  | F   | Primary           | De novo            | +8                       | Negative | AML-not otherwise specified                        | M5    | 3+7                 | HIDAC × 4                 | Yes, 1 y 6 mo      | Yes, myeloablative MRD with residual disease | Alive, 1 y 10 mo               |
| SU306  | 32  | F   | Primary           | De novo            | No analyzable metaphases | Negative | AML-not otherwise specified                        | M5a   | G-CLAC              | G-CLAC × 3                | Unknown            | Unknown                                      | Unknown, lost to f/u 7 mo      |
| SU320  | 68  | M   | Primary           | De novo            | No analyzable metaphases | Negative | AML-not otherwise specified                        | N/A   | Decitabine, 3+7     | Ida + Int Ara-C × 2       | Yes, 5 mo          | Yes, NMA MUD in CR1                          | Deceased, 7 mo                 |
| SU336  | 29  | F   | Primary           | De novo            | t(11;19)(q23;p13.1)      | Negative | AML with 11q23 (MLL)                               | M5    | 3+4                 | HIDAC × 1                 | No                 | Yes                                          | Alive, CR1, 1 y 5 mo           |
| SU353  | 65  | M   | Primary           | De novo            | Normal                   | Positive | AML-not otherwise specified                        | M4    | 3+7                 | None                      | Yes, 2 mo          | No                                           | Deceased, 2 mo                 |
| SU092  | 53  | F   | Primary           | De novo            | Normal                   | Positive | AML-not otherwise specified                        | N/A   |                     |                           |                    | Yes, NMA MRD in CR1                          | Alive, CR1, 2 y 6 mo           |
| SU209  | 65  | F   | Primary           | De novo            | Normal                   | Positive | AML-not otherwise specified                        | M2    |                     | Did not achieve CR        | Primary refractory | No                                           | Deceased, 1 y                  |
| SU277  | 69  | F   | Primary           | De novo            | Normal                   | Negative | AML with myelodysplasia-related changes            | M5    |                     |                           | Yes, 11 mo         | No                                           | Deceased, 1 y 4 mo             |
| SU325  | 59  | F   | Primary           | De novo            | Unknown                  | Positive | AML-not otherwise specified                        | M0/M1 |                     |                           |                    |                                              | Unknown, lost to f/u 6 mo      |
| SU341  | 28  | M   | Primary           | De novo            | Normal                   | Negative | AML-not otherwise specified                        | M1    |                     |                           | No                 | Yes, myeloablative MUD in CR1                | Alive, CR1, 1 y 5 mo           |
| SU351  | 74  | M   | Primary           | Relapsed           | der(10)t(X;10)+8         | Negative | AML with myelodysplasia-related changes            | M5    |                     |                           |                    |                                              | Unknown, lost to f/u 1 mo      |
| SU372  | 53  | F   | Primary           | De novo            | Normal                   | Positive | AML-not otherwise specified                        | M5a   |                     |                           | Yes, 7 mo          | No                                           | Deceased, 10 mo                |
| SU443  | 68  | M   | Primary           | De novo            | Normal                   | Positive | AML-not otherwise specified                        | M1    |                     |                           |                    |                                              | Unknown, lost to f/u 4 mo      |
| SU450  | 41  | M   | Primary           | Primary refractory | Unknown                  | Positive | AML-not otherwise specified                        | M1    |                     |                           |                    | Yes, myeloablative 9/10 mismatch             | Hospice                        |

Table S2. Cont.

| Sample | Age | Sex | Primary/secondary | De novo/relapsed | Cytogenetics | FLT3-ITD | WHO classification                      | FAB | Induction treatment | Consolidation treatment | Relapse?  | Transplant?                   | Current disease status    |
|--------|-----|-----|-------------------|------------------|--------------|----------|-----------------------------------------|-----|---------------------|-------------------------|-----------|-------------------------------|---------------------------|
| SU462  | 85  | F   | Primary           | De novo          | Unknown      | Positive | AML—not otherwise specified             | N/A |                     |                         |           | No                            | Deceased, 1 mo            |
| SU484  | 70  | F   | Primary           | De novo          | Normal       | Negative | AML—not otherwise specified             | M5  |                     | None                    | Yes, 7 mo | No                            | Alive, 7 mo               |
| SU496  | 23  | M   | Primary           | Relapsed         | +6, +8, +11  | Negative | AML—not otherwise specified             | M5  |                     |                         |           |                               | Deceased                  |
| SU501  | 80  | M   | Primary           | De novo          | Normal       | Negative | AML—not otherwise specified             | M5  |                     |                         |           | No                            | Hospice                   |
| SU572  | 72  | M   | Secondary         | From PV          | Unknown      | Unknown  | Unknown                                 | N/A |                     |                         |           |                               | Unknown                   |
| SU580  | 67  | M   | Secondary         | From PV/MF       | Complex      | Negative | AML—not otherwise specified             | N/A |                     |                         |           |                               | Alive                     |
| SU582  | 71  | M   | Primary           | De novo          | Normal       | Positive | AML—not otherwise specified             | N/A |                     |                         |           |                               | Deceased                  |
| SU008  | 63  | M   | Primary           | De novo          | Normal       | Positive | AML—not otherwise specified             | M1  |                     |                         |           |                               | Alive, 7 y 6 mo           |
| SU014  | 58  | M   | Primary           | De novo          | Normal       | Positive | AML—not otherwise specified             | N/A |                     |                         |           |                               | Unknown, lost to f/u 1 mo |
| SU030  | 52  | F   | Primary           | De novo          | Normal       | Positive | AML with myelodysplasia-related changes | M4  |                     |                         | Yes       |                               | Unknown, lost to f/u 9 mo |
| SU043  | 38  | F   | Primary           | De novo          | Normal       | Positive | AML—not otherwise specified             | M4  |                     |                         | No        | Yes, myeloablative MUD in CR1 | Deceased, 2 y 11 mo       |
| SU048  | 75  | F   | Primary           | De novo          | Unknown      | Positive | AML—not otherwise specified             | N/A |                     |                         | No        | No                            | Deceased, 1 mo            |
| SU070  | 72  | F   | Primary           | De novo          | Normal       | Positive | AML with myelodysplasia-related changes | M4  |                     |                         | No        | No                            | Deceased, 1 mo            |

Patient clinical information is provided for each case investigated. Ten patients were profiled by exome sequencing in this study. Six patients were profiled by exome sequencing in our previous study (1). These 16 patients were analyzed and presented in Fig. 2A. Sixteen additional patients were profiled using targeted amplicon sequencing for the presence of recurrent mutations in *IDH1/IDH2*, *DNMT3A*, *NPM1*, *FLT3*, and *KRAS/NRAS* in HSCs. These 16 patients were analyzed and presented in Fig. 2B. Additionally, any of the 16 patients profiled by exome sequencing were also presented in Fig. 2B if the patient had a leukemic mutation in one of the profiled genes. CR, complete remission; FAB, French American British; f/u, follow-up; G-CLAC, clofarabine with high dose cytarabine and granulocyte colony stimulating factor priming; Haplo, haploidentical transplant; HIDAC, high dose cytarabine; Ida, idarubicin; ME, mitocantrone and etoposide; MF, myelofibrosis; MLL, mixed lineage leukemia; MRD, matched lineage leukemia; MUD, matched unrelated donor; NMA, non-myelo ablative; PV, polycythemia vera; TRM, treatment related mortality; WHO, World Health Organization.

1. Jan M, et al. (2012) Clonal evolution of preleukemic hematopoietic stem cells precedes human acute myeloid leukemia. *Sci Transl Med* 4(149):149ra118.

Table S3. Patient leukemia-specific mutations

| AML case | Chromosome | Position               | Gene name        | Accession no. | Mutation type | Ref allele | Var allele     | Annotation      | T-cell variant ratio | T-cell VAF | Leukemia variant ratio | Leuk. VAF |
|----------|------------|------------------------|------------------|---------------|---------------|------------|----------------|-----------------|----------------------|------------|------------------------|-----------|
| SU067    | chr3       | 195,700,761            | AX746839         | AX746839      | SNP           | A          | G              | UTR             | 655/119,886          | 0.55       | 44,039/113,681         | 38.74     |
| SU067    | chr11      | 61,311,105             | C11orf9          | NM_013279     | SNP           | G          | A              | UTR             | 44/30,276            | 0.15       | 40,864/86,126          | 47.45     |
| SU067    | chr18      | 55,273,163             | CCBE1            | NM_133459     | SNP           | C          | A              | G185V           | 5/9,865              | 0.05       | 1,008/11,103           | 9.08      |
| SU067    | chr16      | 54,356,252             | CE54             | NR_003276     | SNP           | G          | A              | UTR             | 4/2,342              | 0.17       | 2,611/2,649            | 98.57     |
| SU067    | chr2       | 237,039,038            | IQCA1            | NM_024726     | SNP           | C          | T              | V259M           | 108/46,026           | 0.23       | 32,092/62,942          | 50.99     |
| SU067    | chr5       | 170,770,149            | NPM1             | NM_199185     | INDEL         | T          | +TCTG          | ins(+TCTG)      | 67/48,592            | 0.14       | 26,698/51,209          | 52.14     |
| SU067    | chr4       | 88,598,209             | NUDT9            | NM_024047     | SNP           | C          | T              | UTR             | 212/76,608           | 0.28       | 41,807/89,316          | 46.81     |
| SU067    | chr2       | 120,075,379            | PCDP1            | NM_001029996  | SNP           | C          | G              | UTR             | 25/19,844            | 0.13       | 3,416/7,391            | 46.22     |
| SU067    | chr12      | 111,372,581            | PTPN11           | NM_002834     | SNP           | G          | A              | A72T            | 42/13,422            | 0.31       | 7,312/16,160           | 45.25     |
| SU067    | chr8       | 117,929,042            | RAD21            | NM_006265     | SNP           | G          | A              | Q592*           | 52/48,538            | 0.11       | 22,528/54,420          | 41.40     |
| SU067    | chr21      | 29,279,099             | RNF160           | NM_015565     | SNP           | C          | T              | V167I           | 3/1,118              | 0.27       | 707/1,425              | 49.61     |
| SU067    | chr2       | 174,528,942            | SP3              | NM_003111     | SNP           | G          | A              | Q182*           | 96/30,452            | 0.32       | 19,199/45,400          | 42.29     |
| SU067    | chr1       | 150,325,022            | TCHHL1           | NM_001008536  | SNP           | C          | T              | G587D           | 61/18,691            | 0.33       | 14,116/29,194          | 48.35     |
| SU072    | chr2       | 219,795,669            | ATG9A            | NM_024085     | SNP           | C          | A              | G597V           | 0/10,535             | 0.00       | 5,311/10,670           | 49.78     |
| SU072    | chr1       | 180,034,849            | CACNA1E          | NM_000721     | SNP           | G          | A              | UTR             | 2/9,111              | 0.02       | 3,876/7,712            | 50.26     |
| SU072    | chr10      | 104,826,926            | CNNM2            | NM_017649     | SNP           | A          | G              | *876W           | 2/1,220              | 0.16       | 7,769/21,651           | 35.88     |
| SU072    | chr2       | 25,320,998             | DNMT3A           | NM_175629     | INDEL         | GTACT      | GTGT           | Q338fs(+G, -AC) | 75/103,254           | 0.07       | 55,444/113,732         | 48.75     |
| SU072    | chr13      | 27,506,223             | FLT3             | NM_004119     | INDEL         | —          | ins(+81bp)     | ITD             | 7/948                | 0.74       | 93/612                 | 15.20     |
| SU072    | chr6       | 47,789,910             | GPR115           | NM_153838     | SNP           | G          | A              | V324I           | 21/40,479            | 0.05       | 16,703/35,083          | 47.61     |
| SU072    | chr15      | 88,432,938             | IDH2             | NM_002168     | SNP           | C          | T              | R140Q           | 12/9,576             | 0.13       | 4,783/9,818            | 48.72     |
| SU072    | chr6       | 160,947,547            | LPA              | NM_005577     | SNP           | G          | A              | P913S           | 72/81,050            | 0.09       | 31,344/58,920          | 53.20     |
| SU072    | chr5       | 170,770,152            | NPM1             | NM_199185     | INDEL         | G          | +GTCA          | ins(+GTCA)      | 5/7,686              | 0.07       | 1,755/3,746            | 46.85     |
| SU072    | chr8       | 32,624,969             | NRG1             | NM_013959     | SNP           | C          | T              | A64V            | 5/15,171             | 0.03       | 7,783/16,953           | 45.91     |
| SU072    | chr2       | 128,460,977            | SAP130           | NM_001145928  | SNP           | C          | T              | V630M           | 104/107,365          | 0.10       | 59,525/118,961         | 50.04     |
| SU072    | chr7       | 128,483,345            | TPI1P2           | NR_002187     | SNP           | T          | A              | UTR             | 60/49,814            | 0.12       | 22,920/56,120          | 40.84     |
| SU080    | chr11      | 118,654,216            | CBL              | NM_005188     | Indel         | AGGTAC     | A              | Q409fs (-GGTAC) | 10/24,035            | 0.04       | 8,088/17,901           | 45.18     |
| SU080    | chr16      | 65,683,825==15,722,691 | inv(16)          | —             | Translocation | —          | —              | Translocation   | 30/33,254            | 0.09       | 20,680/27,881          | 74.17     |
| SU080    | chr12      | 51,876,091             | ITGB7            | NM_000889     | SNP           | C          | A              | V326L           | 4/23,622             | 0.02       | 3,759/7,493            | 50.17     |
| SU080    | chr5       | 56,253,580             | MIER3            | NM_152622     | SNP           | A          | G              | UTR             | 24/4,814             | 0.50       | 1,904/3,811            | 49.96     |
| SU080    | chr7       | 131,503,712            | PLXNA4           | NM_020911     | SNP           | C          | T              | V1393M          | 806/399,887          | 0.20       | 200,704/402,685        | 49.84     |
| SU080    | chr2       | 136,060,541            | R3HDM1           | NM_015361     | SNP           | A          | G              | UTR             | 139/32,248           | 0.43       | 16,371/30,263          | 54.10     |
| SU080    | chr6       | 30,146,845             | RNF39            | NM_170769     | SNP           | A          | G              | UTR             | 67/33,772            | 0.20       | 15,036/28,371          | 53.00     |
| SU080    | chr14      | 99,863,324             | SLC25A47         | NM_207117     | SNP           | C          | T              | S64F            | 206/197,162          | 0.10       | 106,419/215,530        | 49.38     |
| SU227    | chr11      | 111,185,674            | ALG9             | NM_001077692  | SNP           | A          | T              | L368M           | 4/18,455             | 0.02       | 48,323/95,348          | 50.68     |
| SU227    | chr19      | 38,484,844             | CEBPa (allele 1) | NM_004364     | INDEL         | —          | nt317_318dupTT | F106fs(+TT)     | ND                   | ND         | ND                     | ND        |
| SU227    | chr19      | 38,484,190             | CEBPa (allele 2) | NM_004364     | INDEL         | —          | nt971_972ins36 | L324fs(+36)     | 0/3,335              | 0.00       | 4,835/17,432           | 27.74     |
| SU227    | chr3       | 89,472,890             | EPHA3            | NM_005233     | SNP           | C          | A              | P317T           | 1/6,886              | 0.01       | 14,427/25,232          | 57.18     |
| SU227    | chr13      | 27,506,251             | FLT3             | NM_004119     | INDEL         | —          | ins(+21bp)     | ITD             | 7/1,915              | 0.37       | 2,119/8,020            | 26.42     |
| SU227    | chr1       | 243,088,102            | HNRNPJ           | NM_004501     | SNP           | G          | A              | P424L           | 9/11,823             | 0.08       | 46,757/94,501          | 49.48     |
| SU227    | chr7       | 50,417,782             | IKZF1            | NM_006060     | SNP           | G          | A              | G158S           | 14/17,198            | 0.08       | 62,853/133,294         | 47.15     |

Table S3. Cont.

| AML case | Chromosome | Position    | Gene name    | Accession no. | Mutation type | Ref allele | Var allele      | Annotation          | T-cell variant ratio | T-cell VAF | Leukemia variant ratio | Leuk. VAF |
|----------|------------|-------------|--------------|---------------|---------------|------------|-----------------|---------------------|----------------------|------------|------------------------|-----------|
| SU227    | chr1       | 38,033,929  | MANEAL       | NM_152496     | SNP           | G          | A               | UTR                 | 1/1,194              | 0.08       | 809/1,739              | 46.52     |
| SU227    | chr3       | 9,002,005   | SRGAP3       | NM_001033117  | SNP           | C          | T               | UTR                 | 17/12,674            | 0.13       | 25,483/69,656          | 36.58     |
| SU227    | chr2       | 179,181,585 | TTN          | NM_133378     | SNP           | A          | T               | D14898E             | 0/3,517              | 0.00       | 2,679/6,179            | 43.36     |
| SU290    | chr12      | 9,135,105   | A2M          | NM_000014     | SNP           | G          | A               | L810F               | 64/38,891            | 0.16       | 8,461/42,210           | 20.05     |
| SU290    | chr19      | 38,485,093  | CEBPa        | NM_004364     | INDEL         | —          | nt68delC        | P23fs(-C)           | ND                   | ND         | ND                     | ND        |
| SU290    | chr18      | 38,484,251  | CEBPa        | NM_004364     | INDEL         | —          | nt910_912dupAAG | K304(+AAG)          | 245/47,622           | 0.51       | 499/859                | 58.09     |
| SU290    | chr19      | 9,951,071   | COL5A3       | NM_015719     | SNP           | G          | A               | P912L               | 214/39,565           | 0.54       | 18,656/36,403          | 51.25     |
| SU290    | chr13      | 27,506,225  | FLT3         | NM_004119     | INDEL         | —          | ins(+90bp)      | ITD                 | 0/683                | 0.00       | 36/991                 | 3.63      |
| SU290    | chr12      | 4,896,293   | KCNA1        | NM_000217     | SNP           | T          | G               | UTR                 | 6/3,478              | 0.17       | 2,239/3,766            | 59.45     |
| SU290    | chr1       | 115,060,270 | NRAS         | NM_002524     | SNP           | G          | A               | G12D                | 98/161,069           | 0.06       | 18,535/116,054         | 15.97     |
| SU290    | chr13      | 87,128,795  | SLITRK5      | NM_015567     | SNP           | G          | T               | UTR                 | 144/129,589          | 0.11       | 52,934/85,463          | 61.94     |
| SU290    | chr5       | 110,436,504 | TSLP         | NM_033035     | SNP           | G          | G               | N64S                | 166/26,469           | 0.63       | 11,834/23,929          | 49.45     |
| SU291    | chr16      | 80,689,212  | HSD17B2      | NM_002153     | SNP           | G          | C               | K278N               | 2/78,955             | 0.00       | 35,275/71,327          | 49.46     |
| SU291    | chr6       | 73,975,626  | LOC100129128 | NT_086342     | SNP           | G          | A               | UTR                 | 58/26,720            | 0.22       | 10,156/27,886          | 36.42     |
| SU291    | chr17      | 26,587,134  | NF1          | NM_001042492  | SNP           | C          | T               | Q1315*              | 7/6,821              | 0.10       | 1,983/7,894            | 25.12     |
| SU291    | chr5       | 170,770,149 | NPM1         | NM_199185     | InDel         | T          | +TCTG           | ins(+TCTG)          | 3/41,705             | 0.01       | 18,488/36,643          | 50.45     |
| SU291    | chrM       | 8,335       | OK/SW-cl.16  | AB064665      | SNP           | G          | A               | UTR                 | 1/1,113              | 0.09       | 4,557/4,592            | 99.24     |
| SU291    | chr4       | 106,400,238 | TET2         | NM_001127208  | SNP           | T          | A               | C1273S              | 10/8,131             | 0.12       | 4,508/9,521            | 47.35     |
| SU291    | chr4       | 106,400,290 | TET2         | NM_001127208  | SNP           | C          | T               | S1290L              | 1/1,023              | 0.10       | 448/1,010              | 44.36     |
| SU291    | chr8       | —           | Trisomy 8    | —             | Trisomy       | —          | —               | —                   | —                    | —          | —                      | —         |
| SU306    | chr2       | 25,323,964  | DNMT3A       | NM_153759     | INDEL         | A          | G               | del(V149)<br>(-ACT) | 491/164,722          | 0.30       | 84,734/166,534         | 50.88     |
| SU306    | chr19      | 44,125,068  | FBXO17       | NM_024907     | SNP           | G          | A               | UTR                 | 48/105,001           | 0.05       | 39,191/81,787          | 47.92     |
| SU306    | chr13      | 27,490,642  | FLT3         | NM_004119     | SNP           | C          | A               | D835Y               | 1/24,275             | 0.00       | 12,906/29,701          | 43.45     |
| SU306    | chrX       | 9,688,809   | GPR143       | NM_000273     | SNP           | G          | A               | S103L               | 1/2,935              | 0.03       | 2,235/4,454            | 50.18     |
| SU306    | chr15      | 88,432,938  | IDH2         | NM_002168     | SNP           | C          | T               | R140Q               | 20/8,943             | 0.22       | 3,992/8,757            | 45.59     |
| SU306    | chr20      | 47,424,753  | KCNB1        | NM_004975     | SNP           | A          | G               | S251P               | 223/57,689           | 0.39       | 24,960/50,757          | 49.18     |
| SU306    | chr19      | 56,020,752  | KLK15        | NM_138563     | SNP           | C          | T               | UTR                 | 9/22,399             | 0.04       | 7,387/14,087           | 52.44     |
| SU306    | chr6       | 150,024,636 | LATS1        | NM_004690     | SNP           | T          | G               | Q1105H              | 0/10,532             | 0.00       | 5,651/11,671           | 48.42     |
| SU306    | chr17      | 10,368,561  | MYH2         | NM_017534     | SNP           | C          | T               | A1708T              | 23/20,705            | 0.11       | 7,797/16,506           | 47.24     |
| SU306    | chr5       | 170,770,149 | NPM1         | NM_199185     | INDEL         | T          | +TCTG           | ins(+TCTG)          | 23/45,414            | 0.05       | 8,691/17,544           | 49.54     |
| SU320    | chr4       | 164,726,448 | MARCH1       | NM_017923     | SNP           | G          | A               | S92F                | 162/479,669          | 0.03       | 250,698/<br>506,204    | 49.53     |
| SU320    | chr16      | 54,420,325  | CE1          | NM_001266     | SNP           | C          | T               | V38I                | 948/208,353          | 0.45       | 25,831/166,130         | 15.55     |
| SU320    | chr12      | 46,654,291  | COL2A1       | NM_033150     | SNP           | T          | A               | I1320F              | 28/15,160            | 0.18       | 10,666/21,882          | 48.74     |
| SU320    | chr12      | 67,550,270  | CPM1         | NM_198320     | SNP           | C          | T               | G203D               | 85/175,702           | 0.05       | 98,742/200,371         | 49.28     |
| SU320    | chr19      | 52,548,106  | DHX34        | NM_014681     | SNP           | A          | C               | UTR                 | 2/2,403              | 0.08       | 2,288/4,113            | 55.63     |
| SU320    | chr10      | 103,344,463 | DPCC         | NM_015448     | SNP           | C          | A               | D41E                | 1/7,118              | 0.01       | 4,644/10,462           | 44.39     |
| SU320    | chr19      | 6,904,054   | EMR4P        | NR_024075     | SNP           | T          | C               | UTR                 | 7/2,630              | 0.27       | 1,959/3,533            | 55.45     |
| SU320    | chr12      | 29,415,848  | ERGIC2       | NM_016570     | SNP           | T          | G               | UTR                 | 1/913                | 0.11       | 526/1,043              | 50.43     |
| SU320    | chr13      | 27,490,635  | FLT3         | NM_004119     | SNP           | C          | G               | del(I836)           | 2/3,073              | 0.07       | 979/2,629              | 37.24     |
| SU320    | chr15      | 88,432,938  | IDH2         | NM_002168     | SNP           | C          | T               | R140Q               | 23/9,075             | 0.25       | 5,364/11,553           | 46.43     |
| SU320    | chr22      | 16,653,634  | MICAL3       | NM_015241     | SNP           | T          | C               | N1958S              | 33/17,505            | 0.19       | 11,119/20,863          | 53.30     |
| SU320    | chrM       | 13,107      | MTND5        | AF339086      | SNP           | T          | C               | —                   | 17/4,189             | 0.41       | 3,434/3,442            | 99.77     |

**Table S3. Cont.**

| AML case | Chromosome  | Position    | Gene name        | Accession no. | Mutation type | Ref allele | Var allele | Annotation | T-cell variant ratio | T-cell VAF | Leukemia variant ratio | Leuk. VAF |
|----------|-------------|-------------|------------------|---------------|---------------|------------|------------|------------|----------------------|------------|------------------------|-----------|
| SU320    | chr5        | 170,770,149 | <b>NPM1</b>      | NM_199185     | INDEL         | T          | +TCTG      | ins(+TCTG) | 25/33,935            | 0.07       | 13,854/27,088          | 51.14     |
| SU320    | chr15       | 43,687,593  | PLDN             | NM_012388     | SNP           | T          | G          | UTR        | 6/61,759             | 0.01       | 40,175/81,253          | 49.44     |
| SU320    | chr12       | 3,573,358   | PRMT8            | NM_019854     | SNP           | C          | T          | UTR        | 442/407,976          | 0.11       | 209,944/413,041        | 50.83     |
| SU320    | chr3        | 47,073,404  | SETD2 (allele 1) | NM_014159     | SNP           | G          | A          | Q2292*     | 6/42,605             | 0.01       | 25,820/56,980          | 45.31     |
| SU320    | chr3        | 47,133,125  | SETD2 (allele 2) | NM_014159     | SNP           | C          | A          | M1526I     | 3/2,144              | 0.14       | 4,285/8,578            | 49.95     |
| SU320    | chr20       | 1,867,292   | SIRPA            | NM_080792     | SNP           | G          | A          | UTR        | 75/71,993            | 0.10       | 22,403/77,941          | 28.74     |
| SU320    | chr16       | 55,483,538  | <b>SIC12A3</b>   | NM_000339     | SNP           | G          | A          | S804N      | 112/136,738          | 0.08       | 48,359/97,575          | 49.56     |
| SU320    | chr17       | 29,983,847  | TMEM132E         | NM_207313     | SNP           | C          | G          | S408R      | 3/52,355             | 0.01       | 12,746/27,439          | 46.45     |
| SU320    | chr11       | 129,229,907 | TMEM45B          | NM_138788     | SNP           | C          | T          | A124V      | 7/3,292              | 0.21       | 1,114/3,083            | 36.13     |
| SU320    | chr7        | 134,539,724 | WDR91            | NM_014149     | SNP           | C          | A          | A243S      | 10/16,205            | 0.06       | 10,834/22,237          | 48.72     |
| SU336    | chr16       | 272,706     | ARHGDI3          | NM_001176     | SNP           | C          | T          | A190V      | 7/5,819              | 0.12       | 3,272/6,072            | 53.89     |
| SU336    | chrM        | 6,244       | BC018860         | BC018860      | SNP           | G          | A          | UTR        | 5/3,490              | 0.14       | 5,779/14,756           | 39.16     |
| SU336    | chr2        | 88,606,297  | C2orf51          | NM_152670     | SNP           | C          | T          | P7L        | 13/10,036            | 0.13       | 28,213/66,096          | 42.68     |
| SU336    | chr4        | 152,790,420 | FAM160A1         | NM_001109977  | SNP           | G          | A          | V593M      | 10/10,109            | 0.10       | 5,711/13,108           | 43.57     |
| SU336    | chr21       | 32,293,247  | HUNK             | NM_014586     | SNP           | G          | A          | R675H      | 3/3,573              | 0.08       | 3,348/9,773            | 34.26     |
| SU336    | chr1        | 78,893,771  | <b>IFI44</b>     | NM_006417     | SNP           | G          | A          | R276H      | 1/1,037              | 0.10       | 558/1,220              | 45.74     |
| SU336    | chr12       | 25,289,548  | <b>KRAS</b>      | NM_004985     | SNP           | C          | T          | G13D       | 2/4,258              | 0.05       | 668/1,401              | 47.68     |
| SU336    | chr11-chr19 | ND          | <b>MLL-ELL</b>   | —             | Translocation | C          | T          |            | 283/651              | 0.77       | 1,583/2,064            | 76.70     |
| SU336    | chr10       | 69,640,213  | MYPN             | NM_032578     | SNP           | C          | T          | L1320F     | 1/1,853              | 0.05       | 1,677/3,717            | 45.12     |
| SU336    | chr11       | 5,733,339   | OR52N4           | NM_001005175  | SNP           | C          | T          | R265C      | 1/1,026              | 0.10       | 3,986/11,297           | 35.28     |
| SU336    | chr11       | 55,800,090  | OR5T1            | NM_001004745  | SNP           | C          | A          | R134S      | 0/3,498              | 0.00       | 487/1,002              | 48.60     |
| SU336    | chr11       | 47,333,509  | SPI1             | NM_001080547  | SNP           | G          | A          | R221C      | 1/455                | 0.22       | 44/1,053               | 4.18      |
| SU336    | chr11       | 12,921,545  | TEAD1            | NM_021961     | SNP           | A          | G          | UTR        | 0/1,076              | 0.00       | 649/1,226              | 52.94     |
| SU353    | chr6        | 151,716,572 | <b>AKAP12</b>    | NM_005100     | SNP           | A          | G          | UTR        | 11/4,781             | 0.23       | 2,596/4,573            | 56.77     |
| SU353    | chr20       | 30,484,791  | <b>ASXL1</b>     | NM_015338     | SNP           | C          | T          | Q377*      | 44/9,855             | 0.45       | 4,723/9,197            | 51.35     |
| SU353    | chr1        | 92,318,715  | BTBD8            | NM_183242     | SNP           | A          | T          | UTR        | 134/30,520           | 0.44       | 5,637/11,973           | 47.08     |
| SU353    | chr19       | 4,723,269   | C19orf30         | NR_027148     | SNP           | T          | C          | UTR        | 7,500/142,318        | 5.27       | 66,870/128,230         | 52.15     |
| SU353    | chr15       | 91,328,582  | CHD2             | NM_001271     | SNP           | A          | G          | M1029V     | 3/863                | 0.35       | 1,382/2,702            | 51.15     |
| SU353    | chr12       | 122,824,678 | <b>DNAH10</b>    | NM_207437     | SNP           | G          | A          | E118K      | 0/6,003              | 0.00       | 529/1,127              | 46.94     |
| SU353    | chr2        | 25,320,953  | <b>DNMT3A</b>    | NM_022552     | SNP           | C          | A          | G543C      | 256/51,923           | 0.49       | 33,086/62,673          | 52.79     |
| SU353    | chr13       | 27,506,227  | FLT3             | NM_004119     | INDEL         | —          | ins(+57bp) | ITD        | 0/1,065              | 0.00       | 748/1,080              | 69.26     |
| SU353    | chr1        | 153,473,890 | GBA              | NM_000157     | SNP           | C          | G          | G289R      | 3/113,963            | 0.00       | 20,259/81,220          | 24.94     |
| SU353    | chr19       | 19,307,544  | <b>MAU2</b>      | NM_015329     | SNP           | A          | T          | Q98H       | 171/44,844           | 0.38       | 19,320/36,660          | 52.70     |
| SU353    | chr11       | 62,120,701  | <b>MTA2</b>      | NM_004739     | SNP           | T          | A          | D289V      | 142/7,516            | 1.89       | 1,967/3,966            | 49.60     |
| SU353    | chrY        | 15,451,498  | NLGN4Y           | NR_028319     | SNP           | C          | T          | UTR        | 267/879              | 0.33       | 10,071/10,662          | 94.46     |
| SU353    | chr5        | 170,770,148 | <b>NPM1</b>      | NM_199185     | INDEL         | T          | +TCTG      | ins(+TCTG) | 7/71,489             | 0.01       | 30,000/58,240          | 51.51     |
| SU353    | chr15       | 70,344,496  | <b>PARP6</b>     | NM_020214     | SNP           | G          | C          | S103C      | 264/18,980           | 1.39       | 1,616/4,673            | 34.58     |
| SU353    | chr14       | 91,338,428  | TC2N             | NM_001128596  | SNP           | T          | C          | Y131C      | 753/99,191           | 0.76       | 49,937/90,845          | 54.97     |

Exome sequencing of 10 patients identified leukemia-specific mutations. Genomic position, gene accession number, and genetic alteration are annotated. Variant allele frequencies (VAF) obtained by targeted amplicon sequencing of these leukemia-specific mutations in T-cell and leukemia gDNA are provided. Genes highlighted in bold are recurrently mutated according to the TCGA Research Network's AML study (1). INDEL, insertion or deletion; Leuk, leukemia; Ref, reference; Var, variant.

1. Cancer Genome Atlas Research Network (2013) Genomic and epigenomic landscapes of adult de novo acute myeloid leukemia. *N Engl J Med* 368(22):2059-2074.



**Table S4. Analysis of preleukemic and recurrent mutations**

| Mutation no. | Patient | Gene    | Mutation       | Preleukemic? | Evidence for preleukemia                             | TCGA category                 |
|--------------|---------|---------|----------------|--------------|------------------------------------------------------|-------------------------------|
| 1            | SU067   | RAD21   | Q592*          | Yes          | CD19+ lymphoid cells from transplant                 | Cohesin complex               |
| 2            | SU067   | PTPN11  | A72T           | No           | —                                                    | Activated signaling           |
| 3            | SU067   | CES4    | UTR            | No           | —                                                    | Unknown                       |
| 4            | SU067   | NPM1    | ins(+TCTG)     | No           | —                                                    | NPM1                          |
| 5            | SU067   | TCHHL1  | G587D          | No           | —                                                    | Unknown                       |
| 6            | SU067   | CCBE1   | G185V          | No           | —                                                    | Unknown                       |
| 7            | SU072   | CACNA1E | UTR            | No           | —                                                    | Unknown                       |
| 8            | SU072   | DNMT3A  | Q338fs         | Yes          | CD19+ lymphoid cells from transplant                 | DNA methylation               |
| 9            | SU072   | SAP130  | V630M          | Yes          | CD33+ myeloid cells from transplant                  | Chromatin modifiers           |
| 10           | SU072   | LPA     | P913S          | No           | —                                                    | Unknown                       |
| 11           | SU072   | IDH2    | R140Q          | Yes          | CD19+ lymphoid cells from transplant                 | DNA methylation               |
| 12           | SU072   | FLT3    | ITD            | No           | —                                                    | Activated signaling           |
| 13           | SU072   | NPM1    | ins(+GTCA)     | No           | —                                                    | NPM1                          |
| 14           | SU072   | GPR115  | V324I          | No           | —                                                    | Unknown                       |
| 15           | SU072   | ODZ3    | UTR            | Yes          | CD33+ myeloid cells from transplant                  | Unknown                       |
| 16           | SU080   | inv(16) | inversion      | Yes          | Sorted HSCs                                          | Transcription factor Fusions  |
| 17           | SU080   | MIER3   | UTR            | Yes          | Sorted HSCs                                          | Chromatin modifiers           |
| 18           | SU080   | CBL     | Q409fs         | No           | —                                                    | Activated signaling           |
| 19           | SU080   | PLXNA4  | V1393M         | Yes          | Sorted HSCs                                          | Unknown                       |
| 20           | SU080   | R3HDM1  | UTR            | Yes          | Sorted HSCs                                          | Unknown                       |
| 21           | SU227   | TTN     | D14898E        | No           | —                                                    | Unknown                       |
| 22           | SU227   | IKZF1   | G158S          | Yes          | Sorted HSCs                                          | Myeloid transcription factors |
| 23           | SU227   | EPHA3   | P317T          | Yes          | Sorted HSCs                                          | Unknown                       |
| 24           | SU227   | CEBPa   | F106fs(+TT)    | No           | —                                                    | Myeloid transcription factors |
| 25           | SU227   | CEBPa   | L324ins(+12bp) | No           | —                                                    | Myeloid transcription factors |
| 26           | SU227   | FLT3    | ITD            | No           | —                                                    | Activated signaling           |
| 27           | SU290   | NRAS    | G12D           | No           | —                                                    | Activated signaling           |
| 28           | SU290   | CEBPa   | P23fs(-C)      | No           | —                                                    | Myeloid transcription factors |
| 29           | SU290   | CEBPa   | K304ins(+AAG)  | No           | —                                                    | Myeloid transcription factors |
| 30           | SU290   | FLT3    | ITD            | No           | —                                                    | Activated signaling           |
| 31           | SU290   | COL5A3  | P912L          | No           | —                                                    | Unknown                       |
| 32           | SU306   | IDH2    | R140Q          | Yes          | Sorted HSCs and CD19+ lymphoid cells from transplant | DNA methylation               |
| 33           | SU306   | NPM1    | ins(+TCTG)     | No           | —                                                    | NPM1                          |
| 34           | SU306   | FLT3    | D835Y          | No           | —                                                    | Activated signaling           |
| 35           | SU306   | DNMT3A  | del(V149)      | No           | —                                                    | DNA methylation               |
| 36           | SU320   | COL2A1  | I1320F         | Yes          | CD19+ lymphoid cells from transplant                 | Unknown                       |
| 37           | SU320   | IDH2    | R140Q          | Yes          | Sorted HSCs and CD19+ lymphoid cells from transplant | DNA methylation               |
| 38           | SU320   | FLT3    | del(I836)      | Yes          | CD19+ lymphoid cells from transplant                 | Activated signaling           |
| 39           | SU320   | DHX34   | UTR            | Yes          | CD19+ lymphoid cells from transplant                 | Unknown                       |
| 40           | SU320   | NPM1    | ins(+TCTG)     | Yes          | CD19+ lymphoid cells from transplant                 | NPM1                          |
| 41           | SU320   | MTND5   | —              | Yes          | Sorted HSCs and CD19+ lymphoid cells from transplant | Unknown                       |
| 42           | SU320   | SLC12A3 | S804N          | Yes          | CD19+ lymphoid cells from transplant                 | Unknown                       |
| 43           | SU336   | KRAS    | G13D           | No           | —                                                    | Activated signaling           |
| 44           | SU336   | MLL-ELL | t(11;19)       | No           | —                                                    | Chromatin modifiers           |
| 45           | SU336   | IFI44   | R276H          | No           | —                                                    | Unknown                       |
| 46           | SU353   | DNMT3A  | G543C          | Yes          | Sorted HSCs and CD19+ lymphoid cells from transplant | DNA methylation               |
| 47           | SU353   | ASXL1   | Q377stop       | Yes          | Sorted HSCs and CD19+ lymphoid cells from transplant | Chromatin modifiers           |
| 48           | SU353   | AKAP12  | UTR            | No           | —                                                    | Activated signaling           |
| 49           | SU353   | PARP6   | S103C          | Yes          | Sorted HSCs and CD19+ lymphoid cells from transplant | Unknown                       |
| 50           | SU353   | NPM1    | +TCTG          | No           | —                                                    | NPM1                          |
| 51           | SU353   | MAU2    | Q98H           | Yes          | Sorted HSCs and CD19+ lymphoid cells from transplant | Cohesin complex               |

Table S4. Cont.

| Mutation no. | Patient | Gene     | Mutation   | Preleukemic? | Evidence for preleukemia                             | TCGA category                 |
|--------------|---------|----------|------------|--------------|------------------------------------------------------|-------------------------------|
| 52           | SU353   | MTA2     | D289V      | Yes          | Sorted HSCs and CD19+ lymphoid cells from transplant | Chromatin modifiers           |
| 53           | SU353   | DNAH10   | E118K      | Yes          | Single cell-derived colony genotyping                | Unknown                       |
| 54           | SU008   | FLT3     | ITD        | No           | —                                                    | Activated signaling           |
| 55           | SU014   | IDH1     | R132H      | No           | —                                                    | DNA methylation               |
| 56           | SU014   | NPM1     | ins(+TCTG) | Yes          | Sorted HSCs                                          | NPM1                          |
| 57           | SU014   | SMC1A    | R96H       | Yes          | Sorted HSCs                                          | Cohesin complex               |
| 58           | SU014   | KAISO    | C496Y      | Yes          | Sorted HSCs                                          | Chromatin modifiers           |
| 59           | SU014   | C10orf76 | Q380E      | No           | —                                                    | Unknown                       |
| 60           | SU014   | FLT3     | ITD        | No           | —                                                    | Activated signaling           |
| 61           | SU030   | NPM1     | ins(+TCTG) | No           | —                                                    | NPM1                          |
| 62           | SU030   | SLC12A1  | S514R      | No           | —                                                    | Unknown                       |
| 63           | SU030   | FLT3     | ITD        | No           | —                                                    | Activated signaling           |
| 64           | SU048   | TET2     | E1357*     | Yes          | Sorted HSCs                                          | DNA methylation               |
| 65           | SU048   | TET2     | D1384V     | Yes          | Sorted HSCs                                          | DNA methylation               |
| 66           | SU048   | SMC1A    | R711G      | Yes          | Sorted HSCs                                          | Cohesin complex               |
| 67           | SU048   | NPM1     | ins(+TCTG) | No           | —                                                    | NPM1                          |
| 68           | SU048   | FLT3     | ITD        | No           | —                                                    | Activated signaling           |
| 69           | SU070   | PHF6     | G226R      | Yes          | Sorted HSCs                                          | Myeloid transcription Factors |
| 70           | SU070   | DOCK9    | A1475V     | Yes          | Sorted HSCs and CD19+ lymphoid cells from transplant | Unknown                       |
| 71           | SU070   | CTCF     | R11Q       | Yes          | Sorted HSCs and CD19+ lymphoid cells from transplant | Chromatin modifiers           |
| 72           | SU070   | TET2     | Y1649s     | Yes          | Sorted HSCs and CD19+ lymphoid cells from transplant | DNA methylation               |
| 73           | SU070   | TET2     | T1884A     | Yes          | Sorted HSCs and CD19+ lymphoid cells from transplant | DNA methylation               |
| 74           | SU070   | FLT3     | ITD        | No           | —                                                    | Activated signaling           |

Data from all patients where exome sequencing, targeted amplicon sequencing, and HSC transplant data were available were used to investigate patterns of mutation acquisition. Recurrent mutations were classified as either preleukemic or not preleukemic based on the presence of these mutations in sorted HSCs or in cells that resulted from xenotransplantation of HSCs. Each mutation was classified into one of the mutation categories proposed by the TCGA Research Network (1) or labeled as “unknown” when no function was easily attributable to a given mutation in the context of human AML.

1. Cancer Genome Atlas Research Network (2013) Genomic and epigenomic landscapes of adult de novo acute myeloid leukemia. *N Engl J Med* 368(22):2059–2074.
